# Supplementary figures and images for: Quantitative Proteomics to Identify Nuclear RNA-Binding Proteins of Malat1
Source: MDPI journal article supplement (doi:10.3390/ijms21031166), 2020-02-10

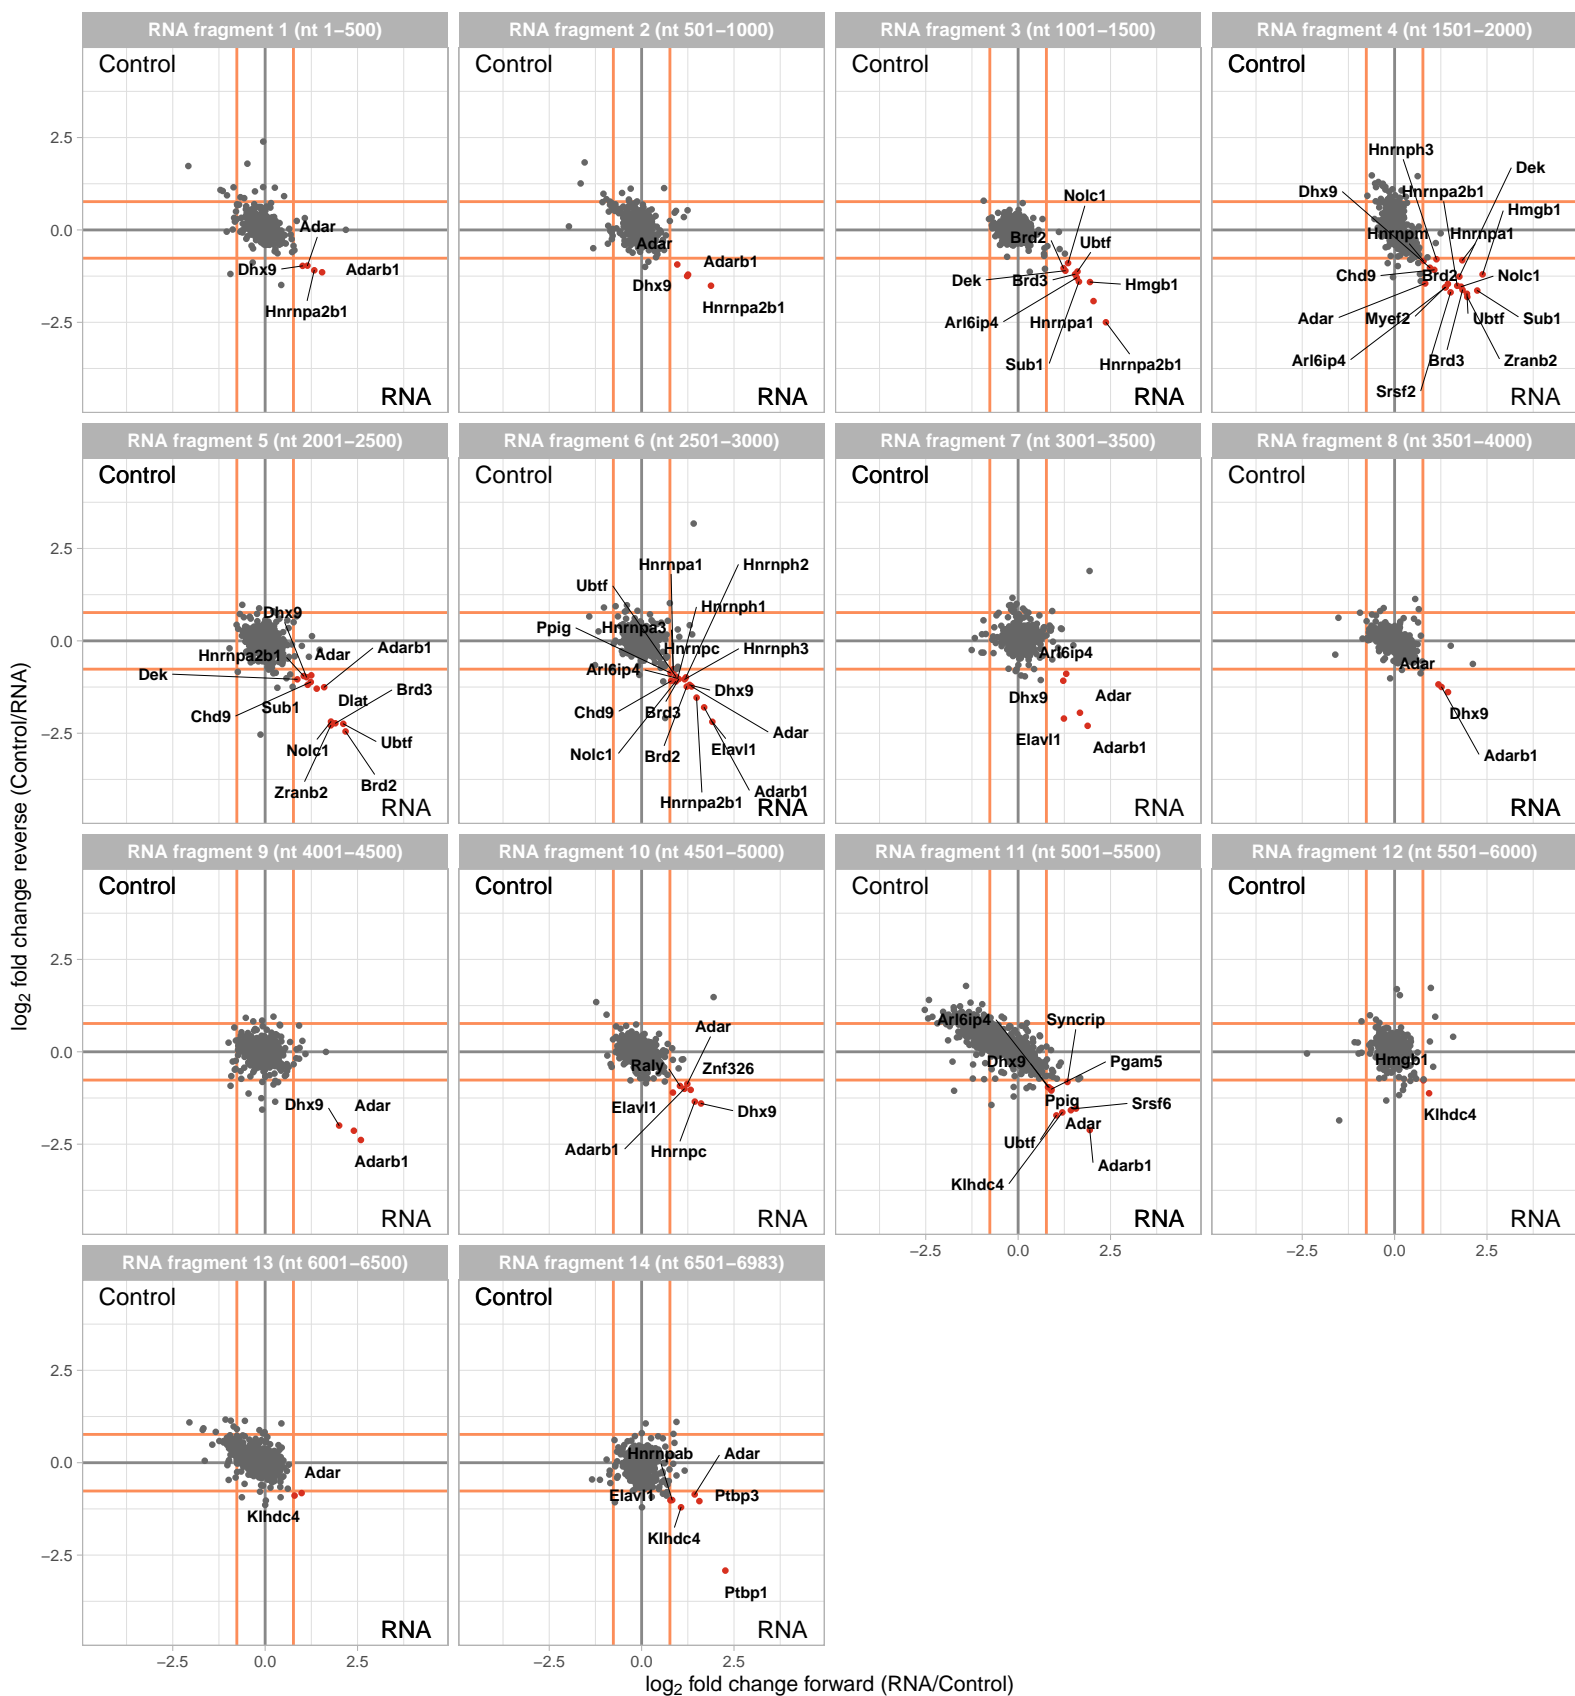

Supplement: s1 [file s1]
